# Supplementary material
Source: MDPI journal article supplement (https://www.mdpi.com/2311-7524/8/12/1152)
Supplement: s1 [file s1]

## Supplementary Material

**Figure S1.** Evolution of the maximum and minimum temperatures during the growing season.

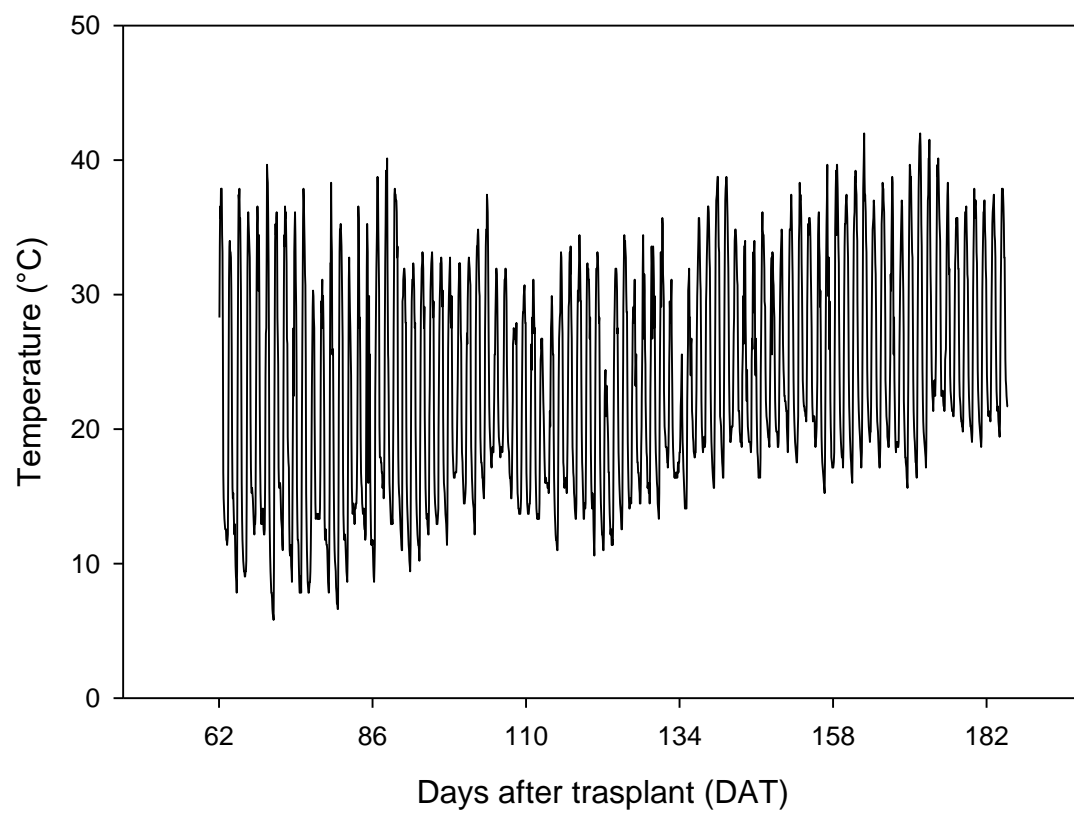

**Table S1.** Concentration of individual phenolic compound ( $\mu\text{g g}^{-1}$  FW) in tomato fruits under different chitosan doses (0, 0.1, and 1  $\text{g L}^{-1}$ ). Like-chlorogenic (L-Chlor), caffeic-O-hexoside (C-O-h), ferulic-O-hexoside (F-O-h), chlorogenic (Chlor), cryptochlorogenic (Crypt), rutin-O-hexoside (R-O-h), caffeic (Caff), rutin-O-pentoside (R-O-p), rutin (Rut), kaempferol-3-O-rutinoside (K-O-r), dicaffeilquinic (Dicaf), naringenin-O-hexoside (N-O-h), naringenin (Nar) and quercetin (Quer) ( $\mu\text{g g}^{-1}$  PF)

|                    |              | L-Chlor            | C-O-h | F-O-h            | Chlor             | Crypt             | R-O-h             | Caff              | R-O-p              | Rut               | K-3-O-r          | Dicaf              | N-O-h             | Nar               | Quer  |
|--------------------|--------------|--------------------|-------|------------------|-------------------|-------------------|-------------------|-------------------|--------------------|-------------------|------------------|--------------------|-------------------|-------------------|-------|
| <b>Doses</b>       | <b>0</b>     | 0.025 <sup>b</sup> | 2.8   | 1.3 <sup>b</sup> | 21.7 <sup>b</sup> | 3.0 <sup>c</sup>  | 0.10 <sup>c</sup> | 0.29 <sup>b</sup> | 0.12 <sup>b</sup>  | 11.9 <sup>b</sup> | 6.9 <sup>b</sup> | 0.69 <sup>c</sup>  | 2.9 <sup>ab</sup> | 33.6 <sup>a</sup> | 0.013 |
|                    | <b>0.1</b>   | 0.024 <sup>b</sup> | 2.7   | 1.1 <sup>b</sup> | 19.5 <sup>b</sup> | 2.6 <sup>b</sup>  | 0.08 <sup>b</sup> | 0.23 <sup>a</sup> | 0.10 <sup>b</sup>  | 10.7 <sup>b</sup> | 6.9 <sup>b</sup> | 0.57 <sup>b</sup>  | 3.6 <sup>b</sup>  | 47.7 <sup>b</sup> | 0.011 |
|                    | <b>1</b>     | 0.019 <sup>a</sup> | 2.5   | 0.9 <sup>a</sup> | 13.9 <sup>a</sup> | 2.0 <sup>a</sup>  | 0.06 <sup>a</sup> | 0.22 <sup>a</sup> | 0.06 <sup>a</sup>  | 7.1 <sup>a</sup>  | 5.2 <sup>a</sup> | 0.39 <sup>a</sup>  | 2.6 <sup>a</sup>  | 32.5 <sup>a</sup> | 0.009 |
|                    |              | *                  | n.s   | **               | ***               | ***               | ***               | *                 | ***                | ***               | *                | ***                | **                | ***               | n.s   |
| <b>Truss</b>       | <b>2</b>     | 0.023              | 2.9   | 1.1              | 16.4              | 2.5               | 0.05              | 0.25              | 0.07               | 6.8               | 4.1              | 0.49               | 1.9               | 28.8              | 0.009 |
|                    | <b>7</b>     | 0.022              | 2.4   | 1.1              | 20.4              | 2.5               | 0.11              | 0.24              | 0.12               | 13.0              | 8.6              | 0.61               | 4.2               | 47.0              | 0.013 |
|                    |              | n.s                | ***   | n.s              | **                | n.s               | ***               | n.s               | ***                | ***               | ***              | *                  | ***               | ***               | *     |
| <b>INTERACTION</b> |              |                    |       |                  |                   |                   |                   |                   |                    |                   |                  |                    |                   |                   |       |
| <b>Truss</b>       | <b>Doses</b> |                    |       |                  |                   |                   |                   |                   |                    |                   |                  |                    |                   |                   |       |
| <b>2</b>           | <b>0</b>     | 0.022              | 2.9   | 1.3              | 17.7              | 2.7 <sup>b</sup>  | 0.05 <sup>a</sup> | 0.30              | 0.09 <sup>b</sup>  | 7.6 <sup>ab</sup> | 4.1              | 0.53 <sup>ab</sup> | 1.3               | 22.6              | 0.012 |
|                    | <b>0.1</b>   | 0.026              | 3.0   | 1.0              | 17.9              | 2.6 <sup>b</sup>  | 0.05 <sup>a</sup> | 0.25              | 0.08 <sup>ab</sup> | 7.4 <sup>ab</sup> | 4.6              | 0.53 <sup>ab</sup> | 2.6               | 41.6              | 0.007 |
|                    | <b>1</b>     | 0.021              | 2.9   | 0.9              | 13.6              | 2.1 <sup>ab</sup> | 0.03 <sup>a</sup> | 0.21              | 0.05 <sup>a</sup>  | 5.4 <sup>a</sup>  | 3.5              | 0.40 <sup>a</sup>  | 1.6               | 22.3              | 0.007 |
| <b>7</b>           | <b>0</b>     | 0.027              | 2.7   | 1.3              | 25.7              | 3.3 <sup>c</sup>  | 0.15 <sup>d</sup> | 0.27              | 0.15 <sup>c</sup>  | 16.2 <sup>c</sup> | 9.6              | 0.84 <sup>c</sup>  | 4.5               | 44.6              | 0.014 |
|                    | <b>0.1</b>   | 0.021              | 2.4   | 1.1              | 21.1              | 2.5 <sup>b</sup>  | 0.10 <sup>c</sup> | 0.21              | 0.13 <sup>c</sup>  | 14.0 <sup>c</sup> | 9.3              | 0.61 <sup>b</sup>  | 4.6               | 53.8              | 0.015 |
|                    | <b>1</b>     | 0.017              | 2.0   | 0.9              | 14.3              | 1.8 <sup>a</sup>  | 0.08 <sup>b</sup> | 0.22              | 0.07 <sup>ab</sup> | 8.9 <sup>b</sup>  | 7.0              | 0.38 <sup>a</sup>  | 3.6               | 42.7              | 0.011 |
|                    |              | n.s                | n.s   | n.s              | n.s               | *                 | **                | n.s               | *                  | *                 | n.s              | *                  | n.s               | n.s               | n.s   |

\*, \*\*, \*\*\* Significant differences between means at a 5, 1, or 0.1% level of probability, respectively; n.s., non-significant at  $P = 5\%$ . Different letters in the same column indicate the presence of significant differences between means according to Tukey's test at the 5% level.
